# Supplementary material for: Cauliflower-like Mn0.2Cd0.8S decorated with ReS2nanosheets for boosting photocatalytic H2evolution activity
Source: Royal Society of Chemistry journal article supplement (doi:10.1039/d1nj02935e), 2021-01-01
Supplement: d1nj02935e1.pdf [file d1nj02935e1.pdf]

## Supplementary Data

Cauliflower-like  $\text{Mn}_{0.2}\text{Cd}_{0.8}\text{S}$  decorated with  $\text{ReS}_2$  nanosheet for boosting photocatalytic  $\text{H}_2$  evolution activity

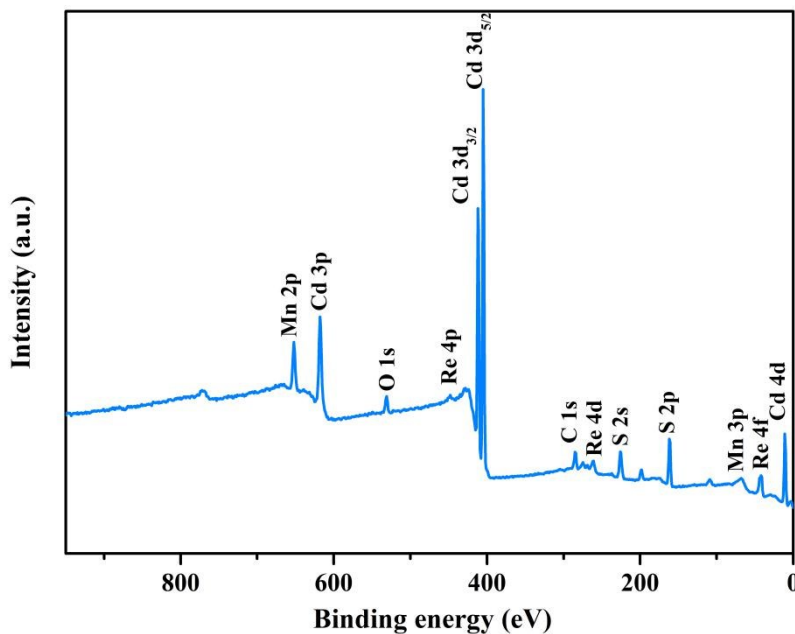

Fig. S1. XPS survey spectrum of the 5wt%  $\text{ReS}_2/\text{MCS}$  composite

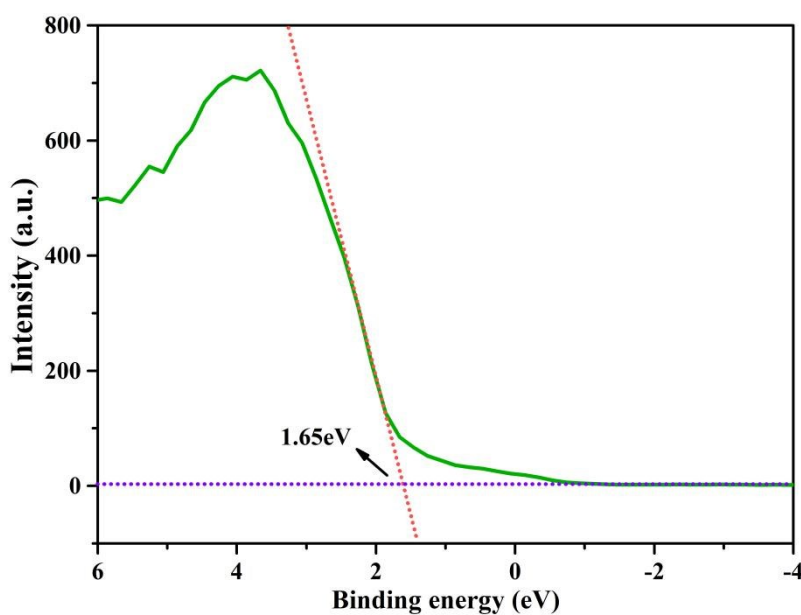

Fig. S2. XPS valence band spectrum of MCS

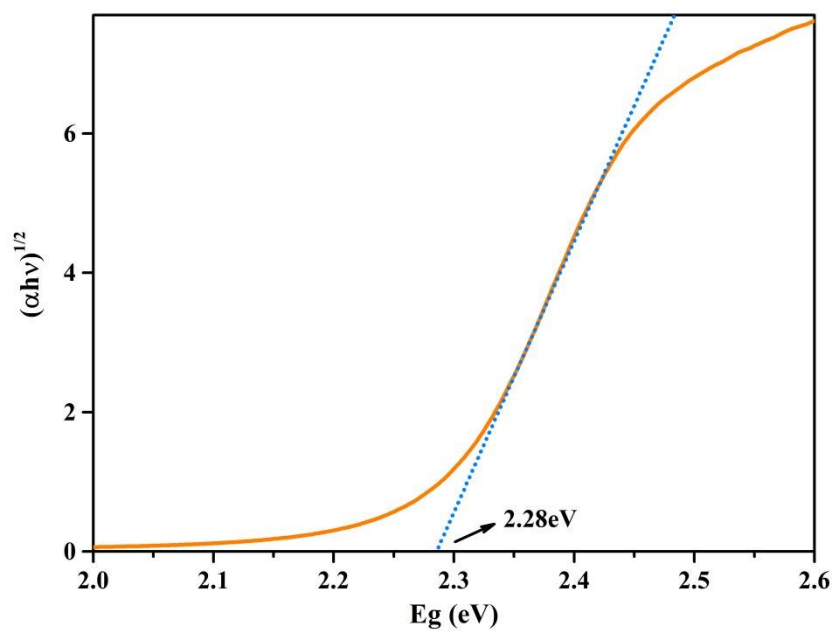

Fig. S3. Kubelka-Munk plots of MCS

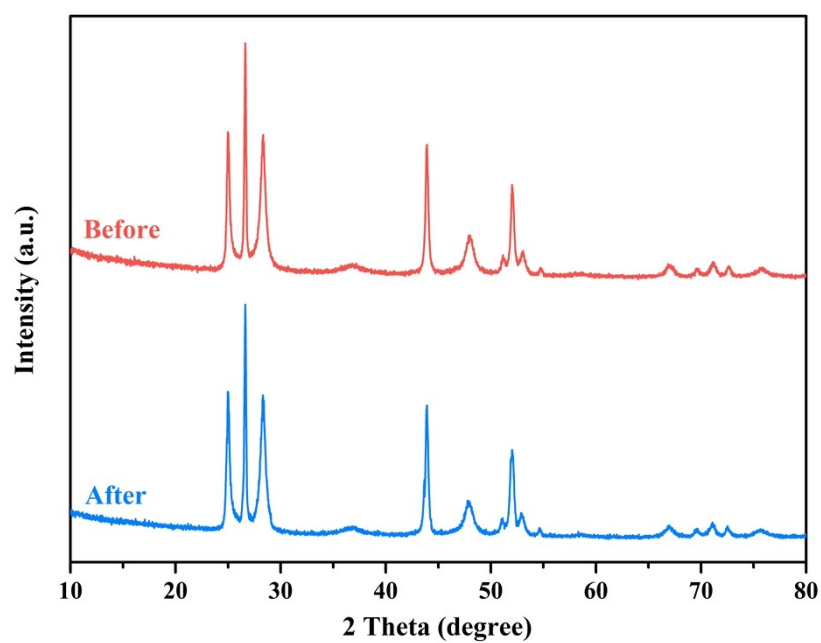

Fig. S4. XRD spectra of 5 wt% ReS<sub>2</sub>/MCS composite before and after cycling test.

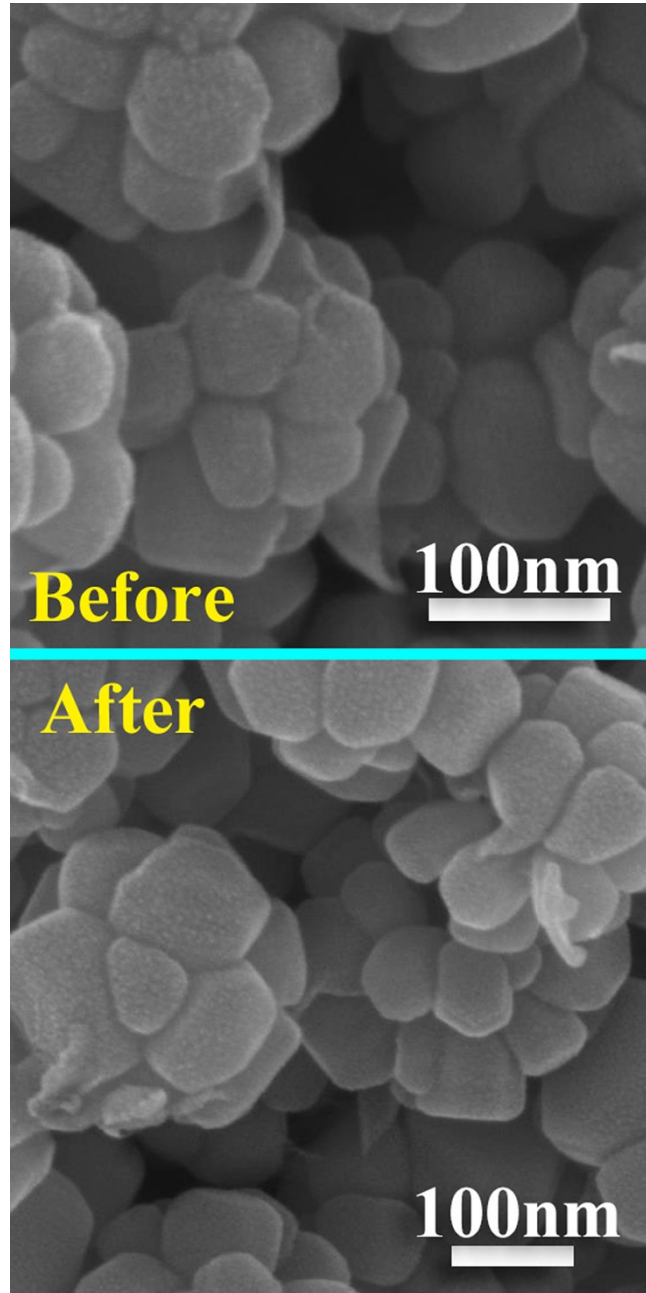

Fig. S5. SEM image of 5 wt% ReS<sub>2</sub>/MCS composite before and after cycling test.

Table S1 Hydrogen evolution rate of photocatalyst modified with co-catalyst.

| Photocatalyst                                           | Light source     | Incident light      | Sacrificial reagent                               | H <sub>2</sub> evolution rate (mmol h <sup>-1</sup> g <sup>-1</sup> ) | AQE (λ)          | Ref.      |
|---------------------------------------------------------|------------------|---------------------|---------------------------------------------------|-----------------------------------------------------------------------|------------------|-----------|
| ReS <sub>2</sub> /Mn <sub>0.2</sub> Cd <sub>0.8</sub> S | 300 W<br>Xe lamp | ≥420nm              | Na <sub>2</sub> S-Na <sub>2</sub> SO <sub>3</sub> | 17.31                                                                 | 16.8%<br>(420nm) | This work |
| NiS/Mn <sub>0.5</sub> Cd <sub>0.5</sub> S               | 300 W<br>Xe lamp | ≥420nm              | Na <sub>2</sub> S-Na <sub>2</sub> SO <sub>3</sub> | 8.386                                                                 | 5.21%<br>(420nm) | S1        |
| MoS <sub>2</sub> /Mn <sub>0.5</sub> Cd <sub>0.5</sub> S | 300 W<br>Xe lamp | ≥420nm              | Na <sub>2</sub> S-Na <sub>2</sub> SO <sub>3</sub> | 3.938                                                                 | 29.2%<br>(450nm) | S2        |
| MoS <sub>x</sub> /CdS                                   | 300 W<br>Xe lamp | ≥420nm              | Na <sub>2</sub> S-Na <sub>2</sub> SO <sub>3</sub> | 22.5                                                                  | /                | S3        |
| MoS <sub>x</sub> /TiO <sub>2</sub>                      | 300 W<br>Xe lamp | /                   | Methanol                                          | 1.836                                                                 | 13.6%<br>(365nm) | S4        |
| NiS/g-C <sub>3</sub> N <sub>4</sub>                     | 3 W LED<br>lamp  | ≥420nm              | TEOA                                              | 0.244                                                                 | /                | S5        |
| NiS/TiO <sub>2</sub>                                    | 300 W<br>Xe lamp | ≥300nm              | Methanol                                          | 0.314                                                                 | /                | S6        |
| NiS/CdS                                                 | /                | ≥420nm              | Na <sub>2</sub> S-Na <sub>2</sub> SO <sub>3</sub> | 7.27                                                                  | 51.3%<br>(420nm) | S7        |
| NiS/g-C <sub>3</sub> N <sub>4</sub>                     | 350 W<br>Xe lamp | ≥420nm              | TEOA                                              | 0.594                                                                 | /                | S8        |
| NiS/C <sub>3</sub> N <sub>4</sub>                       | 300 W<br>Xe lamp | ≥420nm              | TEOA                                              | 4.82                                                                  | 1.9%<br>(440nm)  | S9        |
| NiS/g-C <sub>3</sub> N <sub>4</sub>                     | 300 W<br>Xe lamp | Natural<br>sunlight | TEOA                                              | 16.4                                                                  | /                | S10       |
| NiS/MgAl-LDH                                            | 300 W<br>Xe lamp | ≥420nm              | Methanol                                          | 0.072                                                                 | /                | S11       |
| MoS <sub>x</sub> /TiO <sub>2</sub>                      | 3 W LED<br>lamp  | ≥365nm              | Methanol                                          | 1.1                                                                   | 10.9%            | S12       |
| MoS <sub>x</sub> /TiO <sub>2</sub>                      | 3 W LED<br>lamp  | ≥365nm              | Lactic acid                                       | 3.452                                                                 | 16.5%            | S13       |
| MoS <sub>x</sub> /CdS                                   | 300 W<br>Xe lamp | ≥400nm              | Lactic acid                                       | 8.08                                                                  | /                | S14       |

[S1] X. L. Liu, X. Z. Liang, P. Wang, B. B. Huang, X. Y. Qin, X. Y. Zhang and Y. Dai, *Appl. Catal. B-Environ.*, 2017, **203**, 282–288.

[S2] H. S. Zhai, X. L. Liu, P. Wang, B. B. Huang and Q. Q. Zhang, *Appl. Surf. Sci.*, 2017, **430**, 515–522.

[S3] X. L. Yin, L. L. Li, M. L. Liu, D. C. Li, L. Shang and J. M. Dou, *Chem. Eng. J.*, 2019, **370**, 305–313.

[S4] F. Y. Du, H. Lu, S. S. Lu, J. Wang, Y. Xiao, W. R. Xue, S. N. Cao, *Int. J. Hydrog. Energy*, 2018, **43**, 3223–3234.

[S5] M. Wang, J. J. Cheng, X. F. Wang, X. K. Hong, J. J. Fan and H. G. Yu, *Chinese J. Catal.*, 2021, **42**, 37–45.

- [S6] Y. J. Xin, Y. Lu, C. C. Han, L. Ge, P. Qiu, Y. J. Li and S. M. Fang, *Mater. Res. Bull.*, 2017, **87**, 123–129.
- [S7] W. Zhang, Y. B. Wang, Z. Wang, Z. Y. Zhong and R. Xu, *Chem. Commun.*, 2010, **46**, 7631–7633.
- [S8] K. L. He, J. Xie, M. L. Li and X. Li, *Appl. Surf. Sci.*, 2017, **430**, 208–217.
- [S9] J. D. Hong, Y. S. Wang, Y. B. Wang, W. Zhang and Rong Xu, *ChemSusChem*, 2013, **6**, 2263–2268.
- [S10] H. Zhao, H. Z. Zhang, G. W. Cui, Y. M. Dong, G. L. Wang, P. P. Jiang, X. M. Wu and N. Zhao, *Appl. Catal. B-Environ.*, 2017, **225**, 284–290.
- [S11] J. S. Chen, C. Wang, Y. Zhang, Z. Z. Guo, Y. X. Luo and Chang, J. Mao, *Appl. Surf. Sci.*, 2019, 144999.
- [S12] H. G. Yu, R. R. Yuan, D. D. Gao, Y. Xu and J. G. Yu, *Chem. Eng. J.*, 2019, **375**, 121934.
- [S13] D. D. Gao, R. R. Yuan, J. J. Fan, X. K. Hong and H. G. Yu, *J. Mater. Sci.*, 2020, **56** 122–132.
- [S14] X.L. Fu, L. Zhang, L. H. Liu, H. Li, S. G Meng, X. J. Ye and S. F. Chen, *J. Mater. Chem. A*, 2017, **5**, 15287–15293.
